# Supplementary material for: A graphitic edge plane rich meso-porous carbon anode for alkaline water electrolysis
Source: Royal Society of Chemistry journal article supplement (doi:10.1039/c7cp03208k), 2017-01-01
Supplement: c7cp03208k1.pdf [file c7cp03208k1.pdf]

## Supplementary Information

### Graphitic edge plane rich meso-porous carbon anode for alkaline water electrolysis

*Dongyoon Shin,<sup>a,b</sup> Myounghoon Choun,<sup>a,b</sup> Hyung Chul Ham,<sup>c</sup> Jaekwang Lee,<sup>b,d</sup> and*

*Jaeyoung Lee<sup>\*a,b,d</sup>*

<sup>a</sup> Electrochemical Reaction and Technology Laboratory (ERTL), School of Environmental Science and Engineering, Gwangju Institute of Science and Technology (GIST), Gwangju 500-712, Republic of Korea

<sup>b</sup> Ertl Center for Electrochemistry and Catalysis, GIST Research Institute, GIST, Gwangju 500-712, Republic of Korea

<sup>c</sup> Fuel Cell Research Center, Korea Institute of Science and Technology (KIST), Seoul 136-791, Republic of Korea

<sup>d</sup> Chemical Energy Storage and Transformation Center, RISE, GIST, Gwangju 500-712, Republic of Korea.

\* Corresponding Author

E-mail: jaeyoung@gist.ac.kr, Tel: +82 62 715 2440

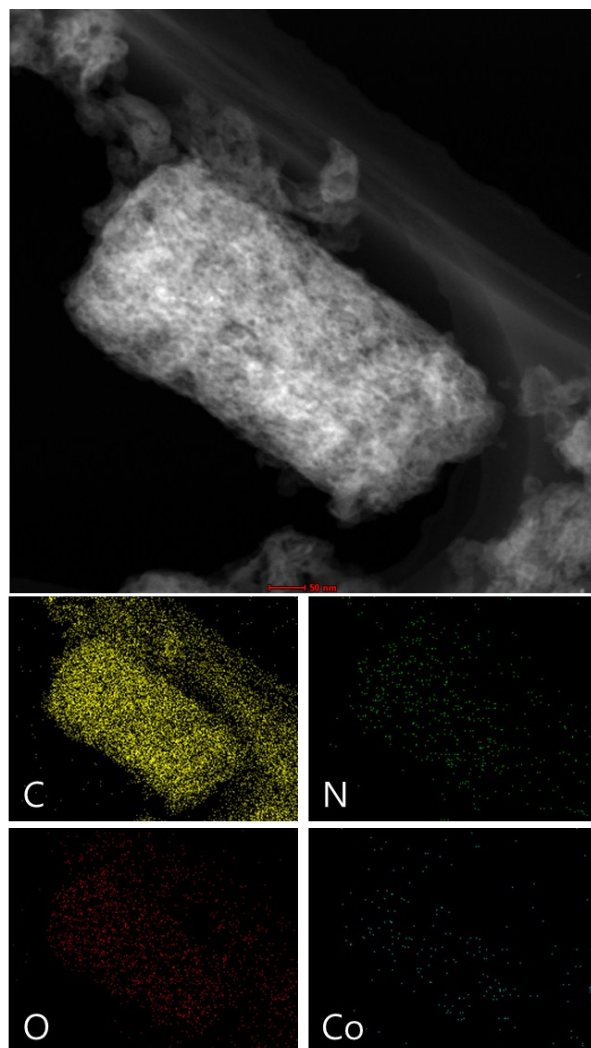

**Figure S1.** STEM image of A-Co-N-CNF and elemental mapping images.

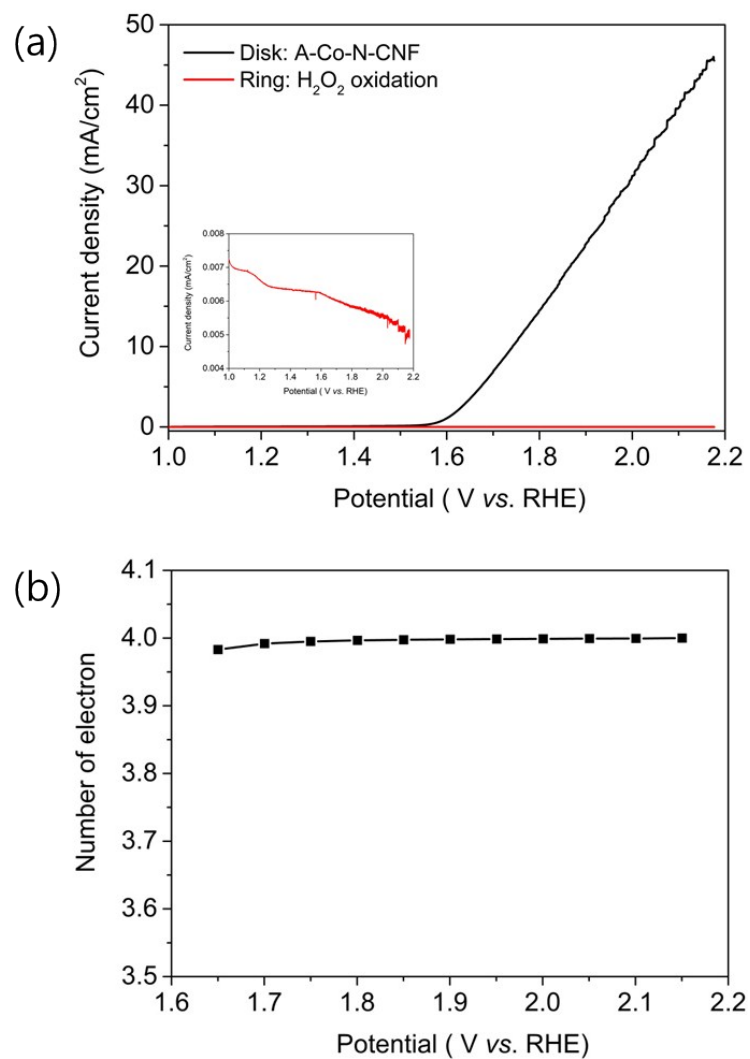

**Figure S2.** (a) Rotating ring disk electrode measurements for detection of H<sub>2</sub>O<sub>2</sub> generated from the A-Co-N-CNF catalysts. (b) The number of electrons calculated from the rotating ring disk electrode measurement (ring potential: 1.5 V vs. RHE).

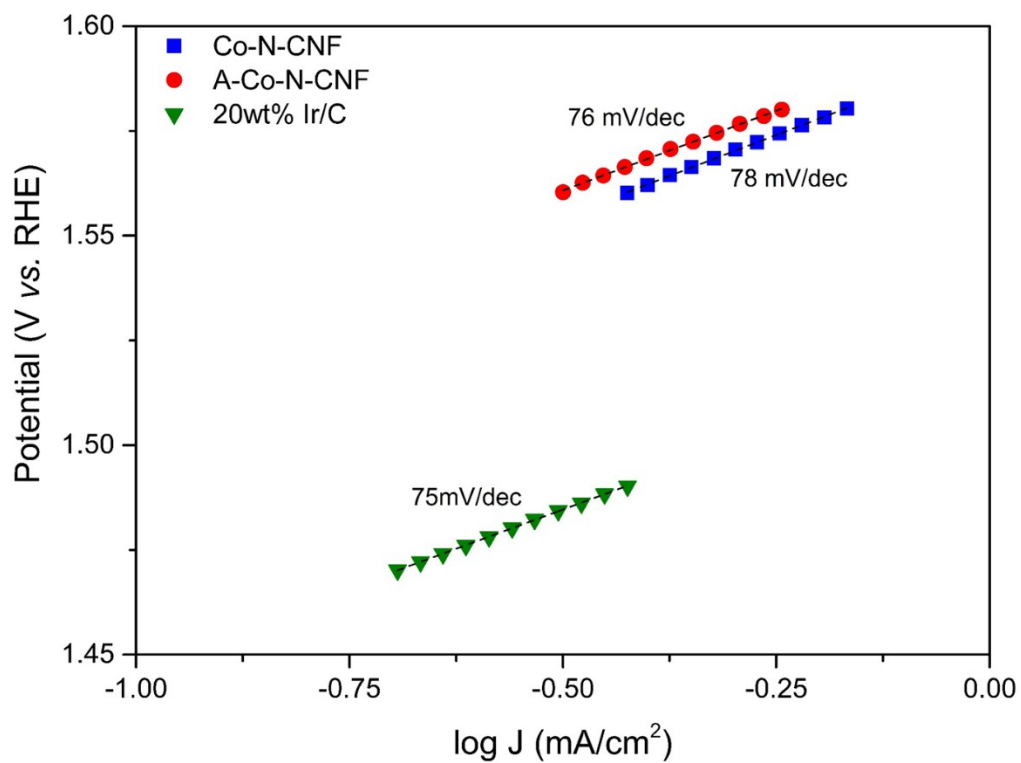

**Figure S3.** Tafel plots for Co-N-CNF, A-Co-N-CNF, and 20 wt% Ir/C which are obtained from linear sweep voltammetry at a scan rate of 5 mV s<sup>-1</sup> (not iR-Corrected).

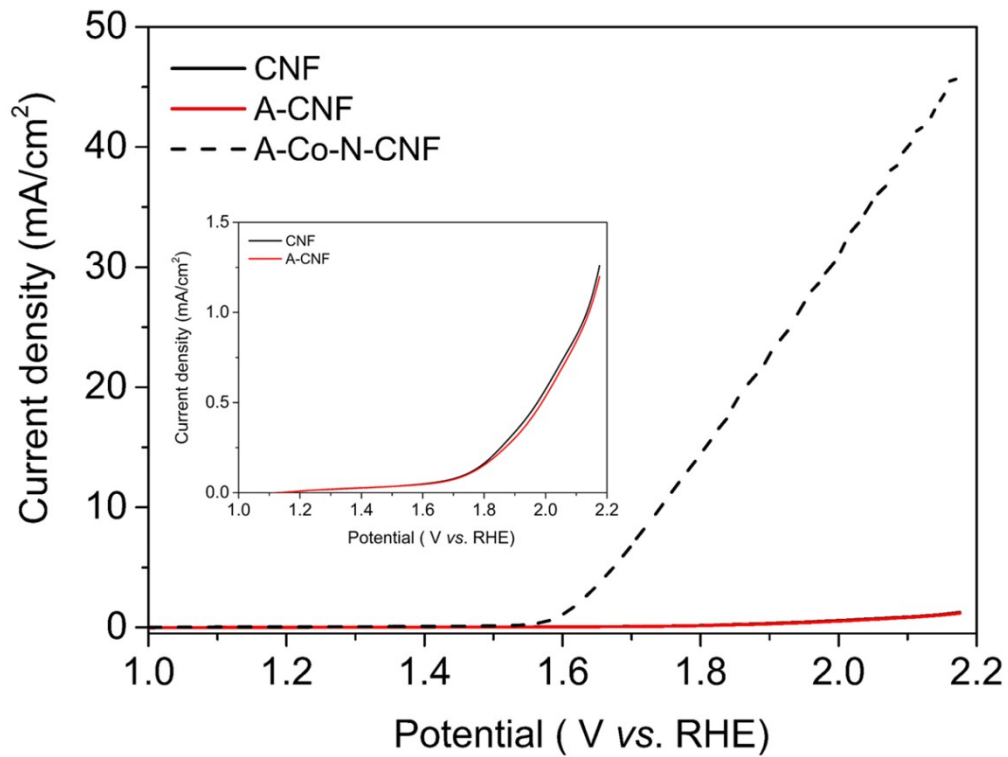

**Figure S4.** Oxygen evolution reaction activity of A-Co-N-CNF, CNF, and A-CNF with rotating disk electrode at a rotating rate of 1600rpm and a scan rate of 5 mV s<sup>-1</sup> in N<sub>2</sub>-saturated 0.1 M KOH aqueous solution.

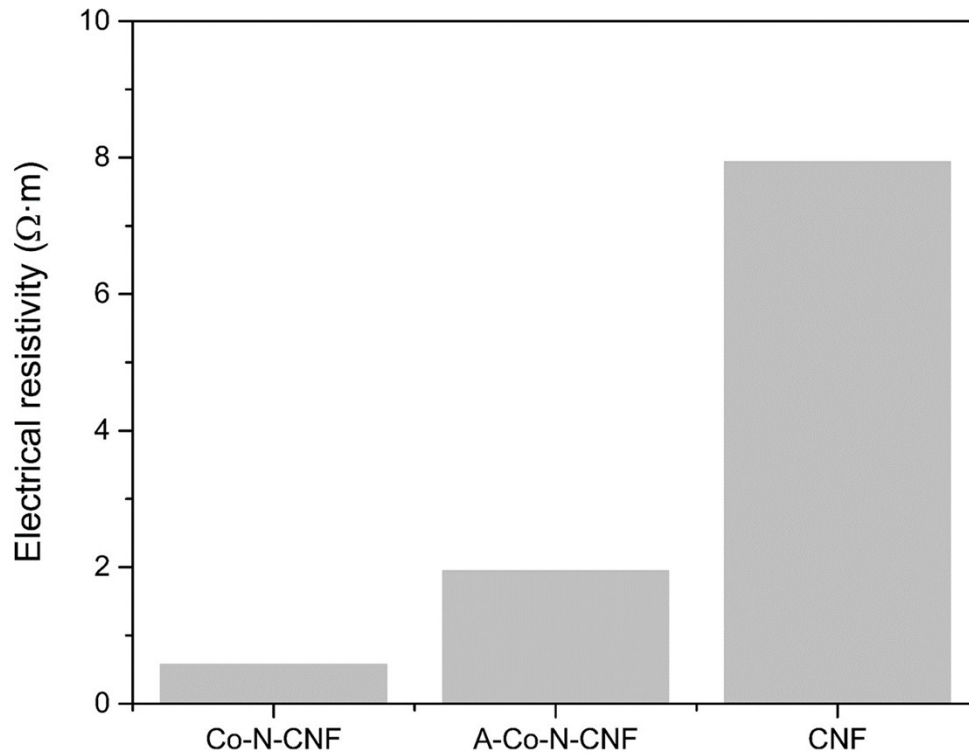

**Figure S5.** The results of electrical resistivity measurement by four-point probe for Co-N-CNF, A-Co-N-CNF, and CNF. Each sample was coated on carbon paper, where thickness was 300  $\mu m$  and the probe thickness was 1.590 mm. For accurate reliability, each test was conducted on 3 different samples and repeated at least 20 times.

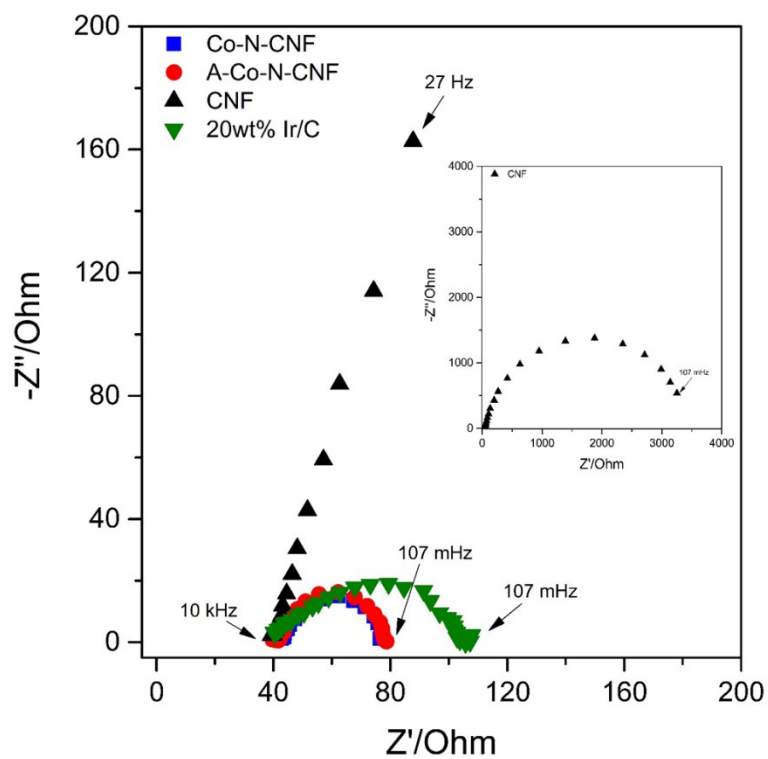

**Figure S6.** Nyquist plots obtained by EIS at 450 mV overpotential for the oxygen evolution reaction. The frequency range investigated reached from 10 kHz to 107 mHz with 30 points.

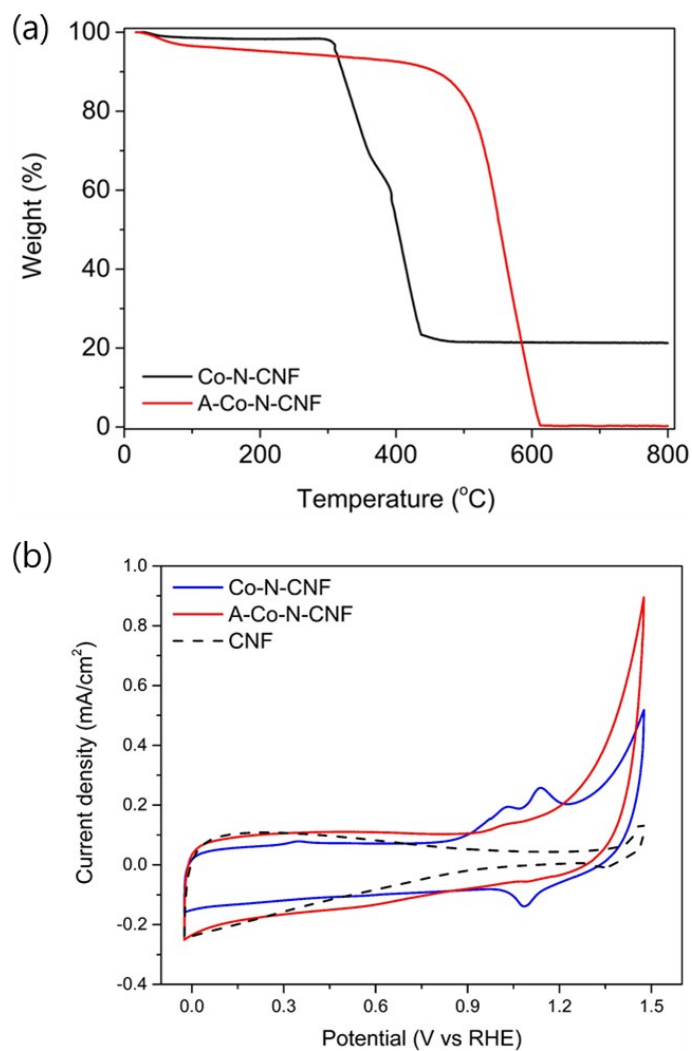

**Figure S7.** (a) Thermo-gravimetric analysis of Co-N-CNF and A-Co-N-CNF under air environment, (b) Cyclic voltammograms of Co-N-CNF, A-Co-N-CNF, and CNF in N<sub>2</sub>-saturated 0.1 M KOH aqueous solution with glassy carbon electrode at a scan rate of 5 mV s<sup>-1</sup>.

**Table S1.** The bulk element composition of Co-N-CNF, A-Co-N-CNF, and CNF (wt%). The composition of metal is obtained from thermo-gravimetric analysis and the composition of C, N, and O is measured by energy dispersive spectrometer.

| <b>Sample</b>     | <b>C</b> | <b>N</b> | <b>O</b> | <b>Co</b> |
|-------------------|----------|----------|----------|-----------|
| <b>Co-N-CNF</b>   | 76.77    | 0.76     | 1.20     | 21.27     |
| <b>A-Co-N-CNF</b> | 96.94    | 0.44     | 3.62     | -         |
| <b>CNF</b>        | 94.43    | 2.23     | 3.34     | -         |

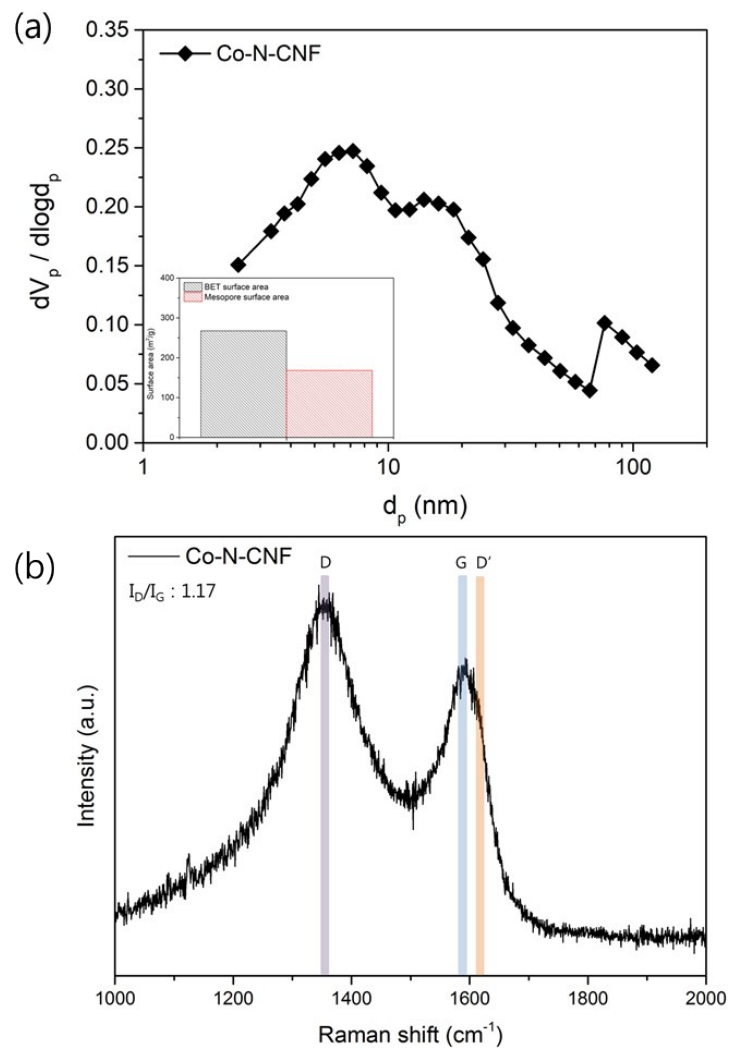

**Figure S8.** (a) Pore size distribution and (b) Raman spectrum of Co-N-CNF. The inset indicates the BET surface area and mesopore surface area.

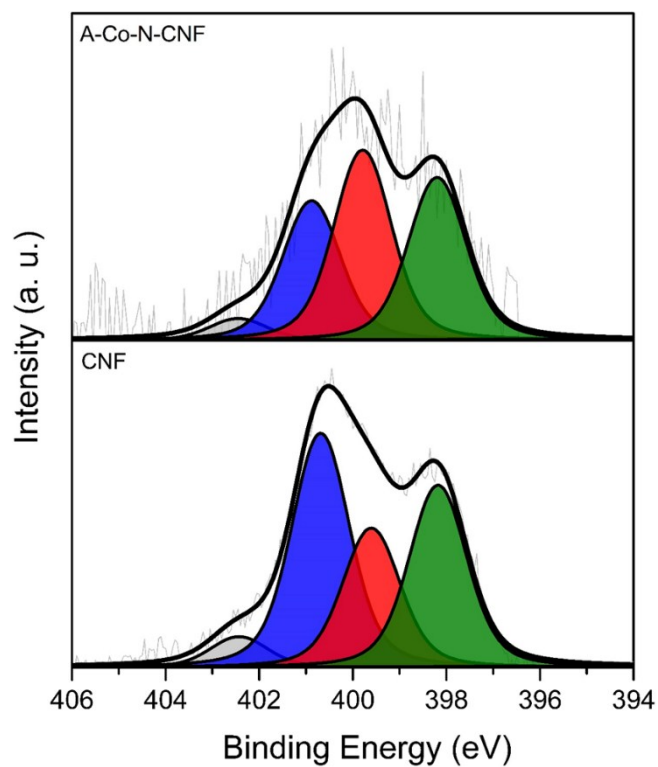

**Figure S9.** X-ray photoelectron spectrum at N 1s of A-Co-N-CNF and CNF. Each line denotes the various binding energies of doped nitrogen: Pyridinic-N; ~398 eV, Pyrrolic-N; ~400 eV, Graphitic-N; ~401 eV, and Pyridinic-N-oxide; 402–403 eV.

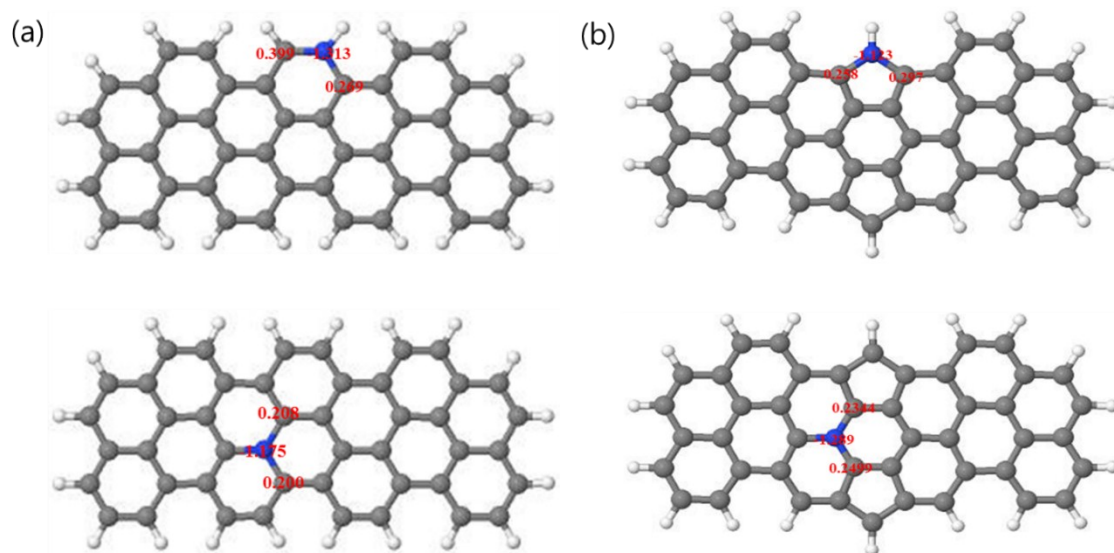

**Figure S10.** Partial charge distributions of nitrogen-doped graphite surfaces with different doping position. (a) (upper)  $C_{45}N(\text{edge})H_{20}$ , (lower)  $C_{45}N(\text{basal})H_{20}$  and (b) (upper)  $C_{45}N(\text{edge})$ , (lower)  $H_{18} C_{45}N(\text{basal})H_{18}$ . Gray; carbon atoms, blue; nitrogen atom, white; hydrogen atoms. The charge distributions are shown in Table S2.

**Table S2.** Partial charge distributions of nitrogen-doped graphite surfaces with different doping position. The negative sign indicates the electronic charge gain and all values are given in  $e$  unit.

| (a)                                                       | Charge distribution for $C_{45}N(\text{edge})H_{20}$ , | Charge distribution for $C_{45}N(\text{basal})H_{20}$ |
|-----------------------------------------------------------|--------------------------------------------------------|-------------------------------------------------------|
| N                                                         | -1.314                                                 | -1.175                                                |
| C1                                                        | 0.399                                                  | 0.314                                                 |
| C2                                                        | 0.269                                                  | 0.208                                                 |
| C3                                                        | 0.057                                                  | 0.143                                                 |
| C4                                                        | 0.062                                                  | -0.008                                                |
| Average charge distribution of carbon atoms near a N atom | 0.197                                                  | 0.164                                                 |

| (b)                                                       | Charge distribution for $C_{45}N(\text{edge})H_{18}$ | Charge distribution for $C_{45}N(\text{basal})H_{18}$ |
|-----------------------------------------------------------|------------------------------------------------------|-------------------------------------------------------|
| N                                                         | -1.123                                               | -1.351                                                |
| C1                                                        | 0.258                                                | 0.214                                                 |
| C2                                                        | 0.297                                                | 0.363                                                 |
| C3                                                        | -0.004                                               | 0.274                                                 |
| C4                                                        | 0.036                                                | 0.113                                                 |
| C5                                                        | N/A                                                  | 0.004                                                 |
| C6                                                        | N/A                                                  | -0.098                                                |
| Average charge distribution of carbon atoms near a N atom | 0.147                                                | 0.145                                                 |

**\* Computational details:**

The calculations reported herein were performed on the basis of spin-polarized density functional theory (DFT) within the generalized gradient approximation (GGA-PBE<sup>1</sup>), as implemented in the Vienna Ab-initio Simulation Package (VASP<sup>2</sup>). The projector augmented wave (PAW) method with a planewave basis set was employed to describe the interaction between ion cores and valence electrons<sup>3</sup>. The PAW method is in principle an all-electron frozen-core approach that considers exact valence wave functions. An energy cutoff of 400 eV was applied for the plane-wave expansion of the electronic eigenfunctions. In this study, we considered four different nitrogen-containing graphene clusters: (I) C<sub>45</sub>N(edge)H<sub>20</sub>, in which a N atom is located in the edge of graphene cluster, (II) C<sub>45</sub>N(basal)H<sub>20</sub>, in which a N atom is located in the basal of cluster, (III) C<sub>45</sub>N(edge)H<sub>18</sub>, in which a N atom is located in the edge of graphene cluster, (IV) C<sub>45</sub>N(basal)H<sub>18</sub>, in which a N atom is located in the basal of graphene cluster. Here, the configuration of N atoms in each edge and basal location is determined by comparing the total energy of different N positions in graphene clusters. For the edge case, the configuration of H-terminated N atom is chosen since that is more energetically stable by 0.29eV(C<sub>45</sub>NH<sub>20</sub>) and 0.20eV (C<sub>45</sub>NH<sub>18</sub>) than the bare N atom case. For the basal case, the configuration of N atoms directly connected to the edge carbon is calculated to be more stable by 0.01eV(C<sub>45</sub>NH<sub>20</sub>) and 0.72eV(C<sub>45</sub>NH<sub>18</sub>) than the configuration of N atoms bonded to the basal carbon.

All atoms in graphene clusters were fully relaxed using the conjugate gradient method until residual forces on all the constituent atoms become smaller than  $5 \times 10^{-2}$  eV/Å. For Brillouin zone integration, we used one k-point (Gamma point) with graphene clusters in a

periodic box of dimension =  $30 \times 30 \times 20$  Å. We further checked the convergence of our calculation results with respect to different k-point mesh size, indicating that the chosen values are sufficient for describing the total energies of the model systems considered. We evaluated the atomic charge states of nitrogen-containing graphene clusters using the Bader method<sup>4</sup> with the optimal convergence with respect to charge density grid.

## Reference

- (1) Perdew, J. P.; Burke, K.; Ernzerhof, M. *Phys. Rev. Lett.* **1996**, 77 (18), 3865–3868.
- (2) Kresse, G.; Furthmüller, J. VASP the Guide; Vienna University of Technology: Vienna, Austria, 2001.
- (3) Blöchl, P. E. *Phys. Rev. B* **1994**, 50 (24), 17953–17979.
- (4) Sanville, E.; Kenny, S. D.; Smith, R.; Henkelman, G. *J. Comput. Chem.* **2007**, 28 (5), 899–908.
